# Supplementary figures and images for: Intersections of class, lifestyle and politics. New observations from Norway
Source: Springer Nature journal article supplement (doi:10.1007/s11609-022-00472-y), 2022-06-01

**Fig. 6** CHAID analysis of party choice by position in social space and space of lifestyles

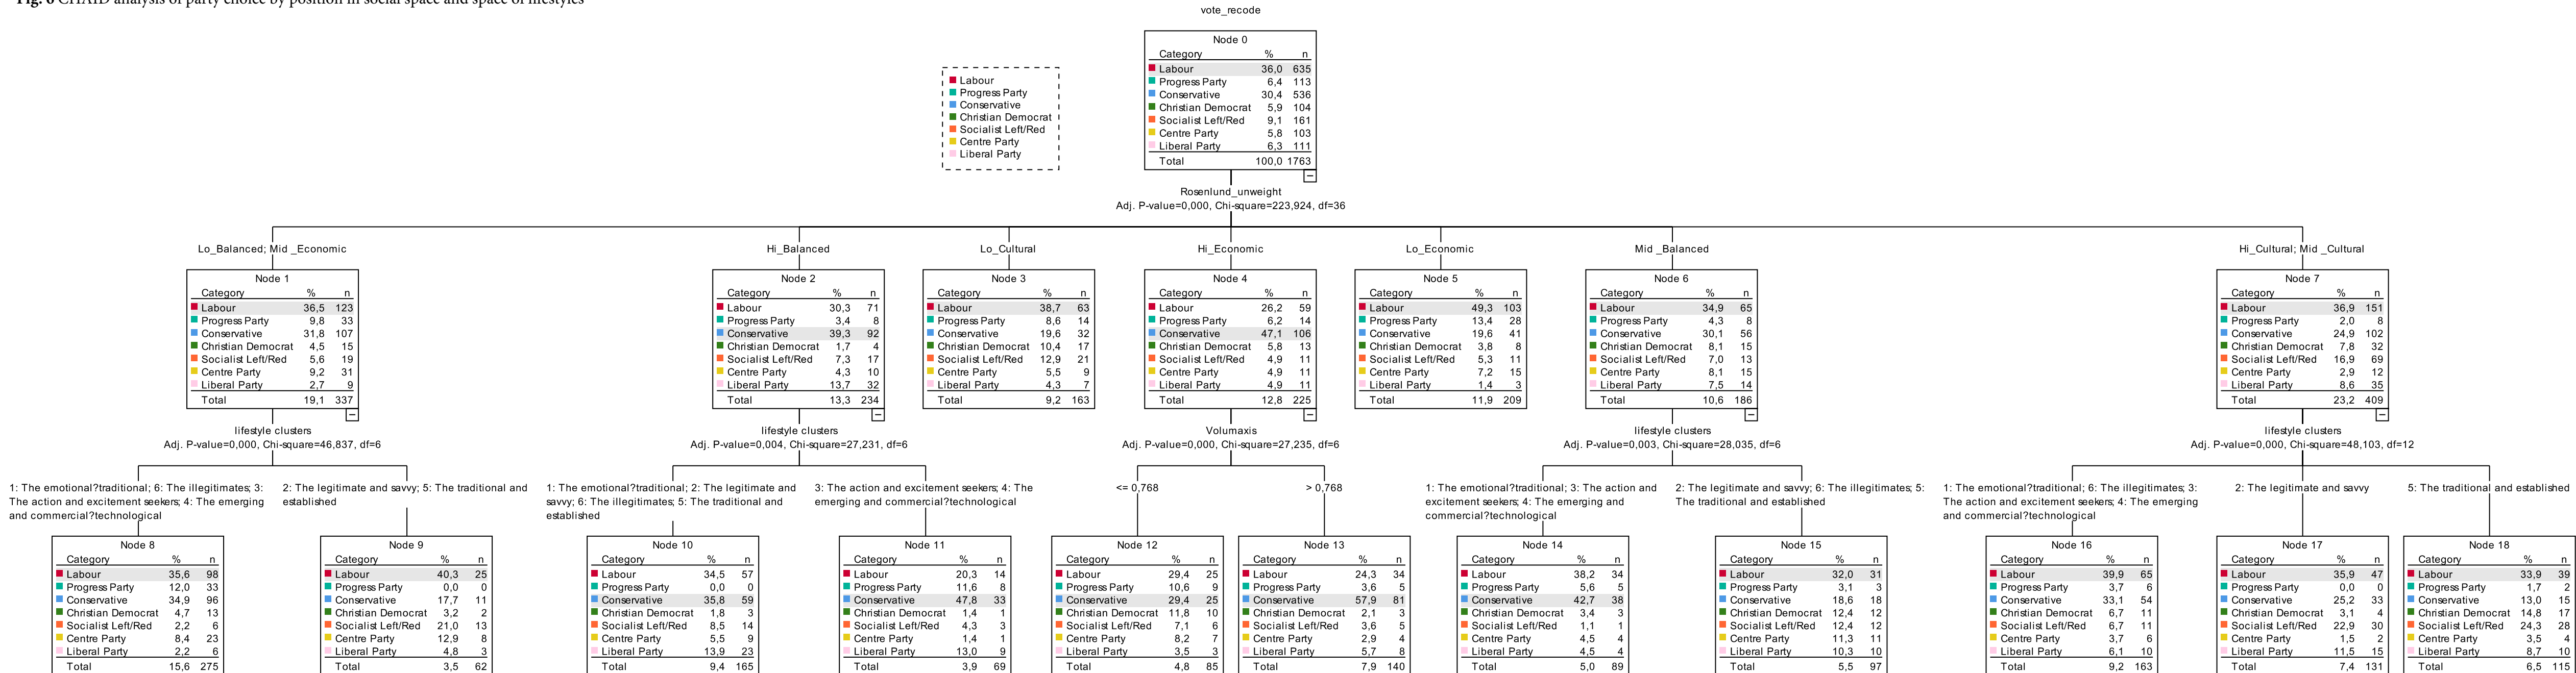

Supplement: MOESM1 [file 23158088]
